# Supplementary material for: Lower Blood pH as a High Predisposing Factor for a Fatal Outcome in Critically Ill COVID-19 Patients at Intensive Care Unit: a Multivariable Analysis
Source: Research Square preprint supplement (doi:10.21203/rs.3.rs-685940/v1), 2021-07-08
Supplement: Supplementary file 1 [file ee972ee0563f8b522c70f55c.docx]

**Supplement 9**


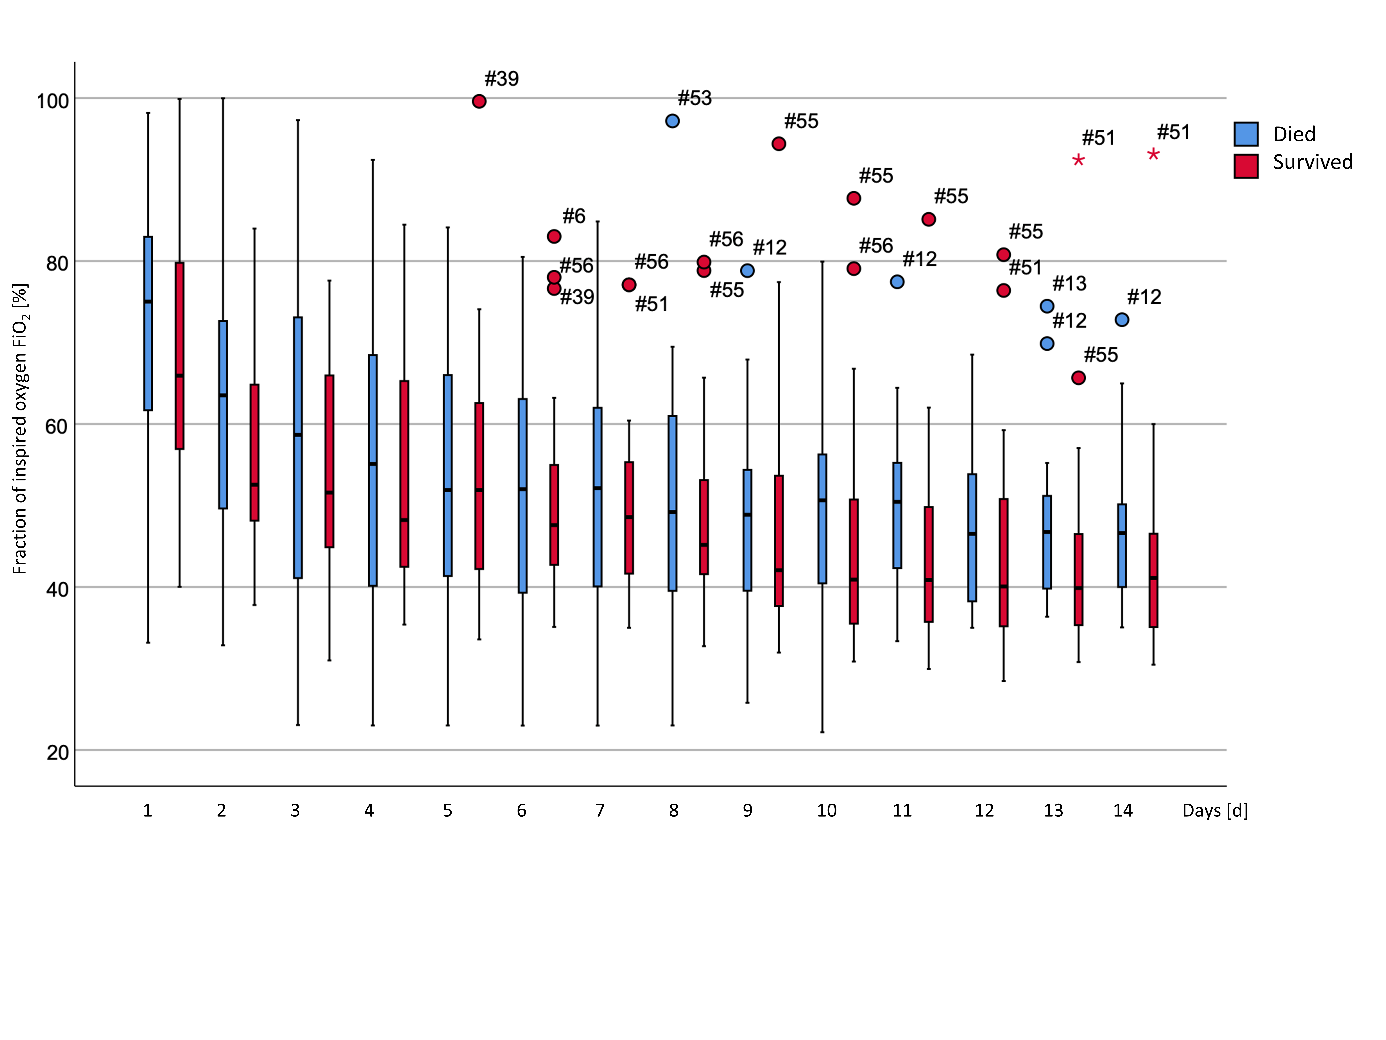


***Figure 1*** *Daily mean values for the fraction of inspired oxygen (FiO2). Significant differences between the two groups are marked with an asterisk in the legend of the x-axis.*


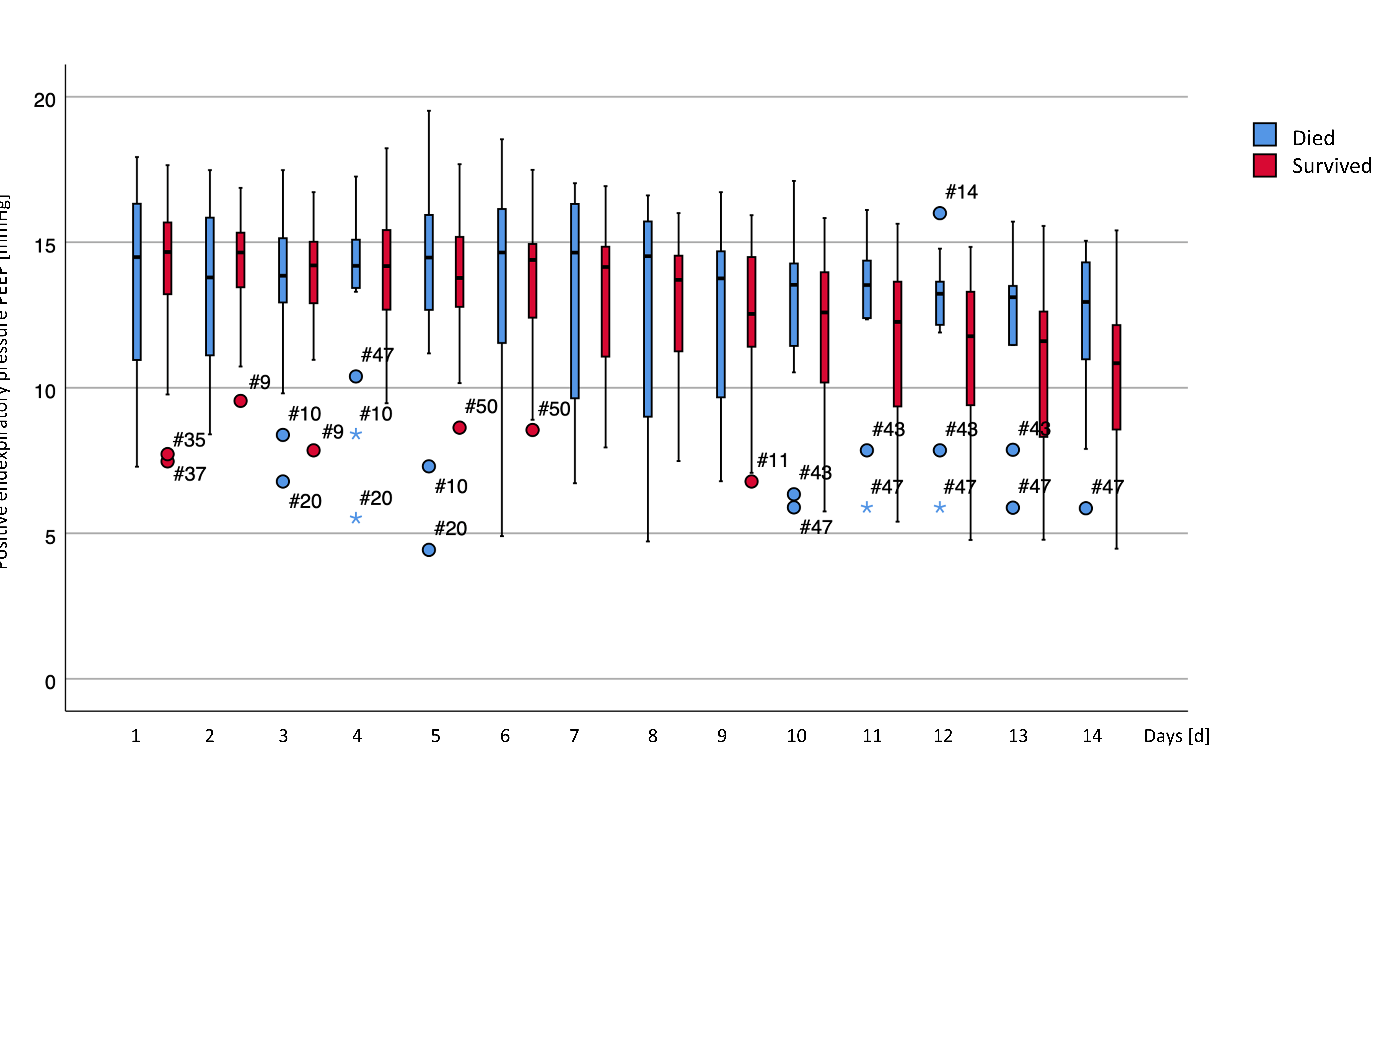


***Figure 2*** *Daily mean values for positive endexpiratory pressure (PEEP). Significant differences between the two groups are marked with an asterisk in the legend of the x-axis.*


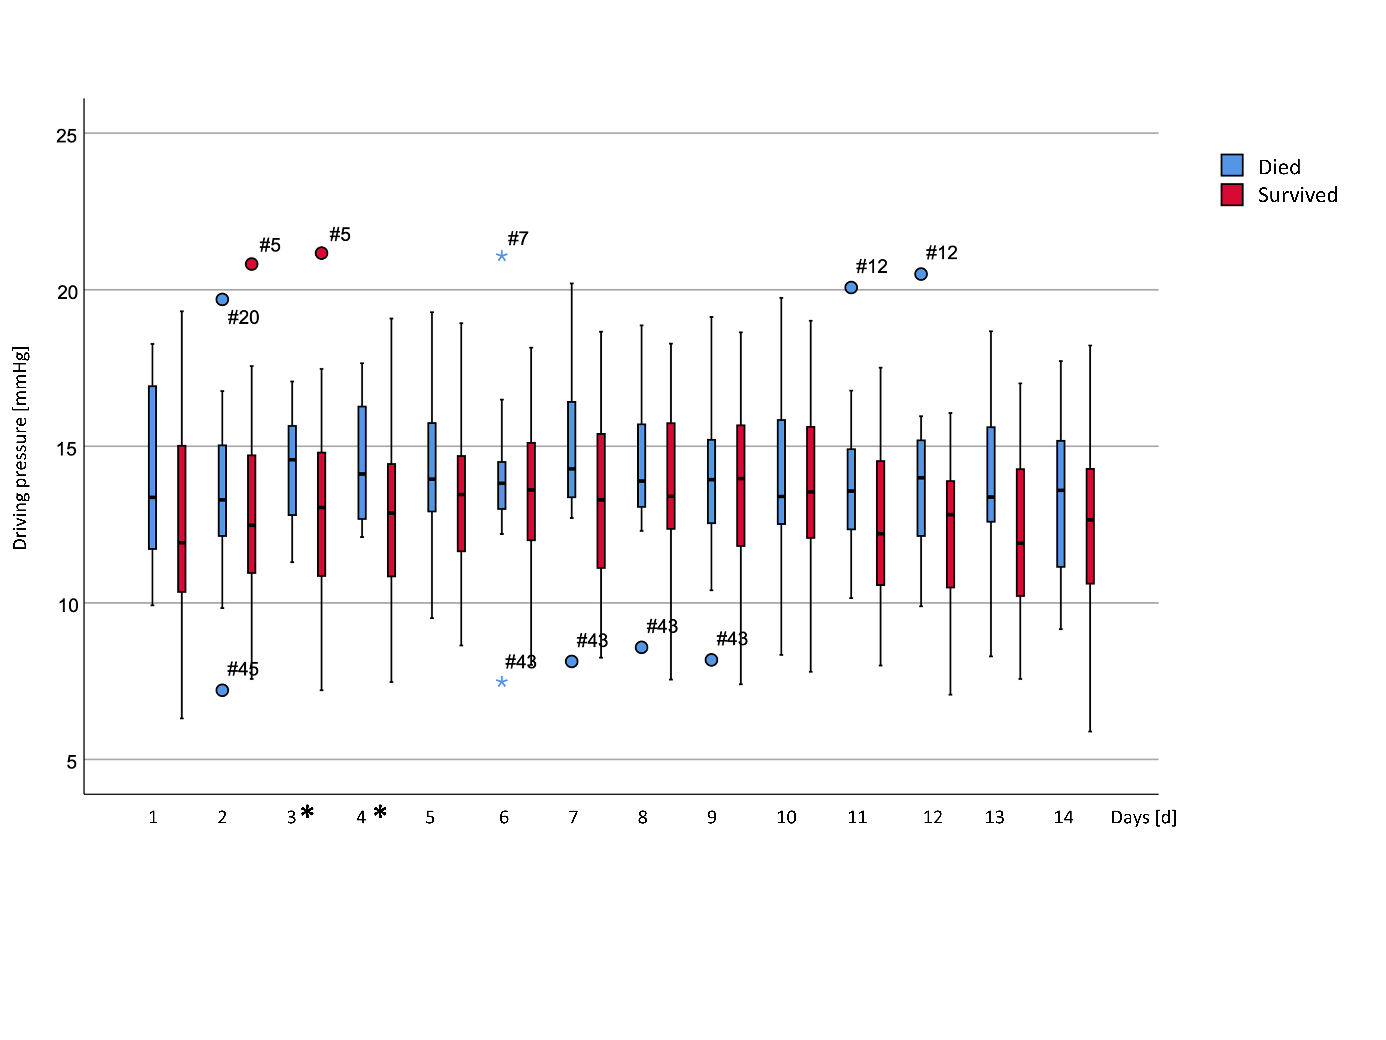


***Figure 3*** *Daily mean values for driving pressure. Significant differences between the two groups are marked with an asterisk in the legend of the x-axis.*


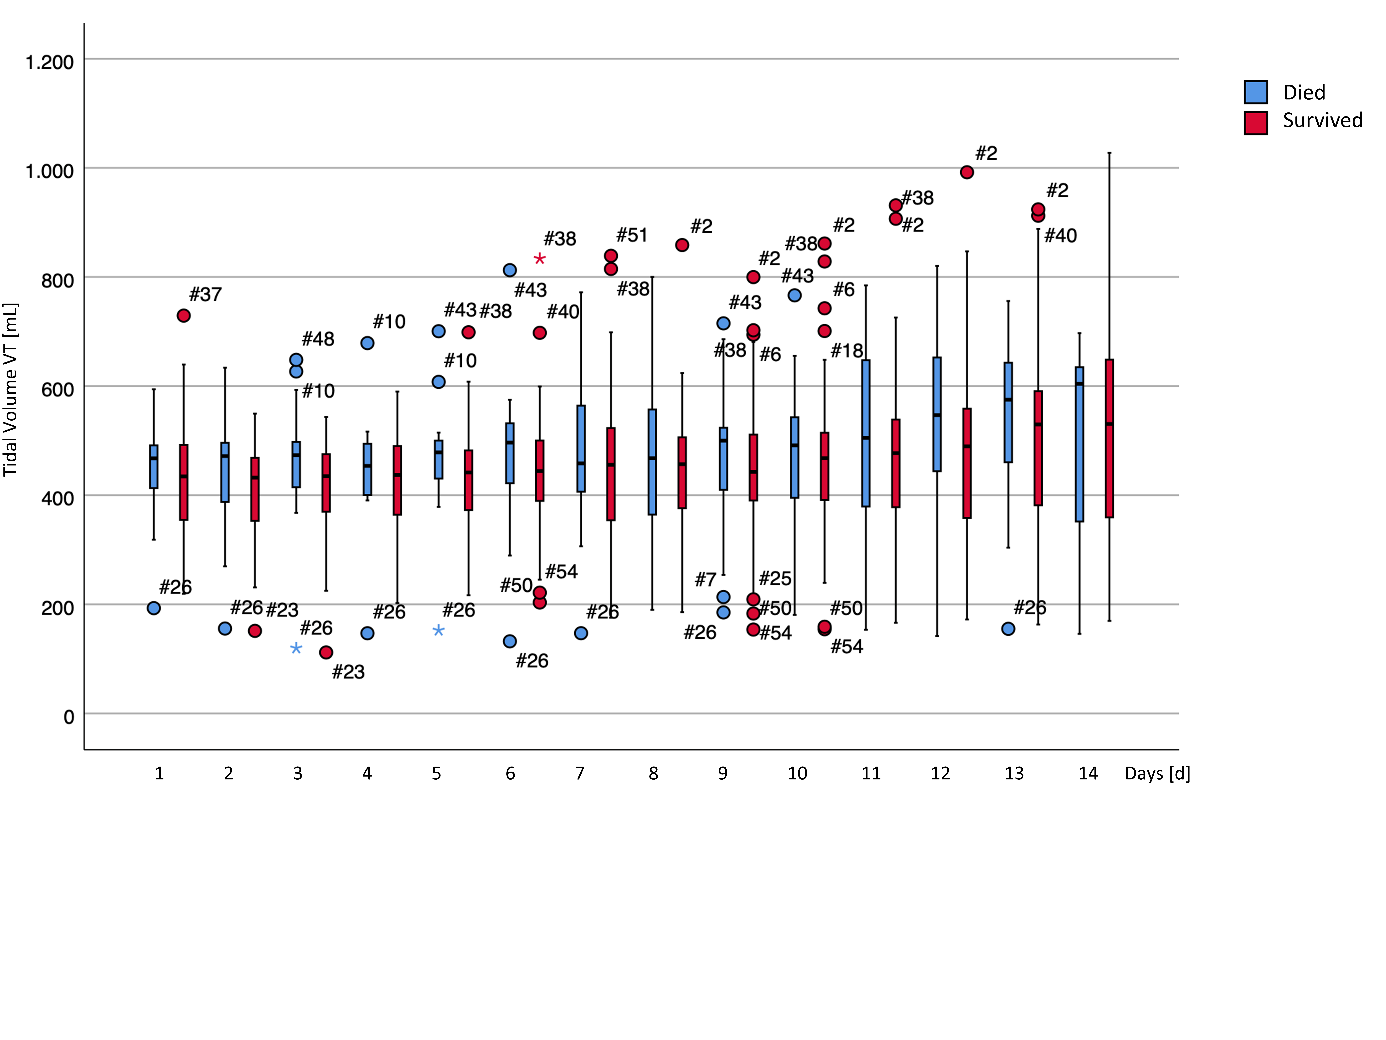


***Figure 4*** *Daily mean values for tidal volume (VT). Significant differences between the two groups are marked with an asterisk in the legend of the x-axis.*


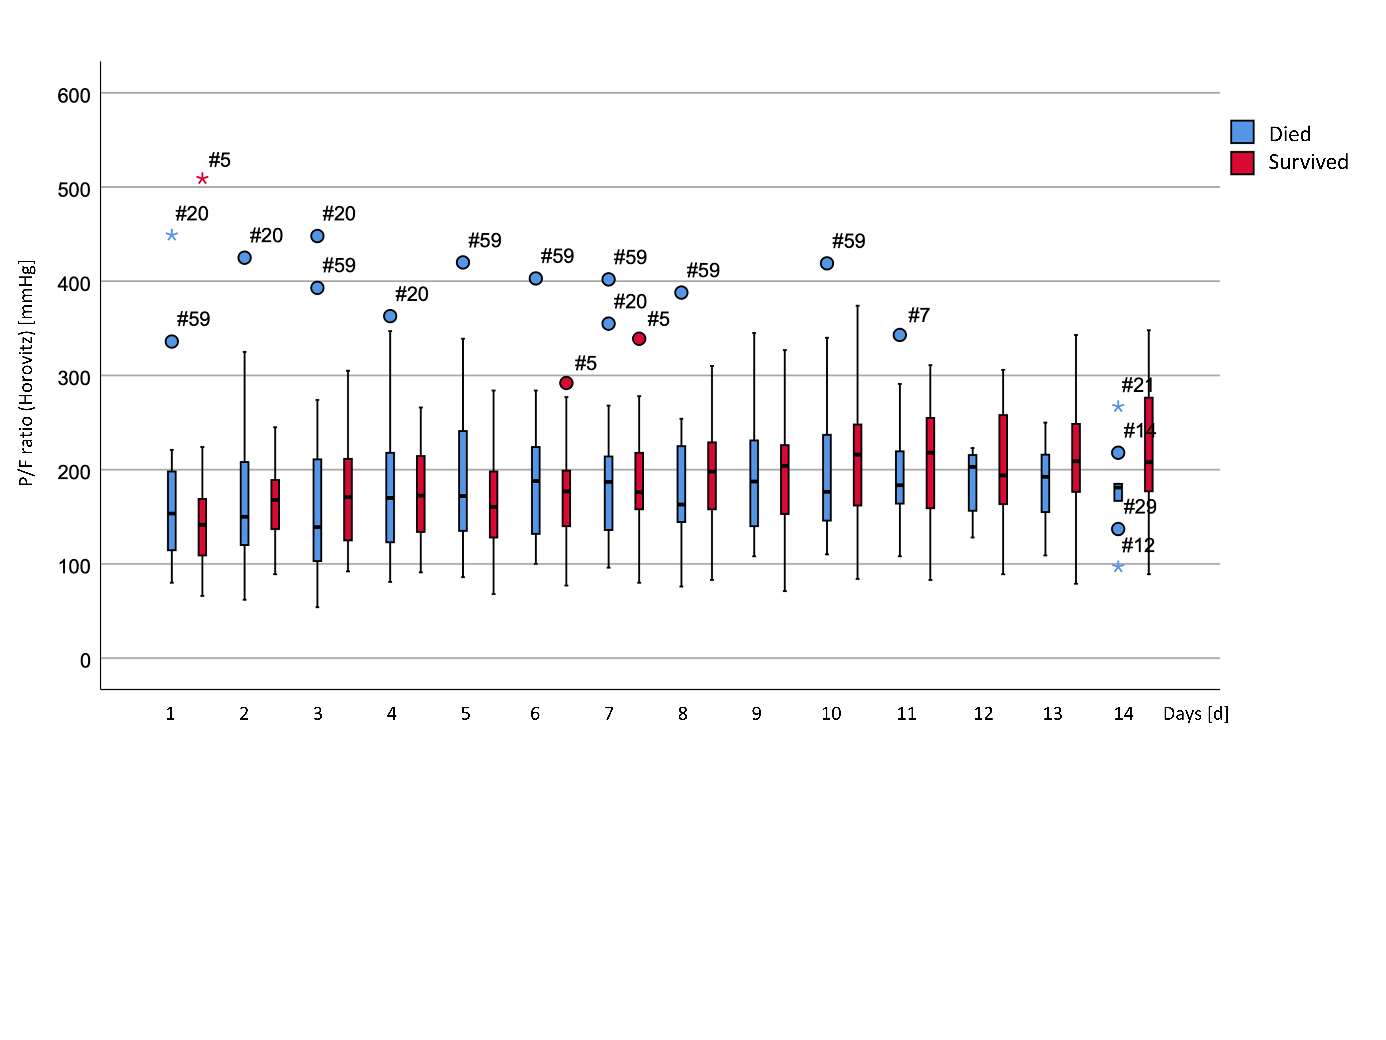


***Figure 5*** *Daily mean values for the paO2/FiO2 ratio (P/F ratio). Significant differences between the two groups are marked with an asterisk in the legend of the x-axis.*
