# Supplementary material for: Lower Blood pH as a High Predisposing Factor for a Fatal Outcome in Critically Ill COVID-19 Patients at Intensive Care Unit: a Multivariable Analysis
Source: Research Square preprint supplement (doi:10.21203/rs.3.rs-685940/v1), 2021-07-08
Supplement: Supplementary file 3 [file 621dd67bfee76e709b88dc3b.docx]

**Supplement 3**

***Figure 1*** *Distribution of age*

***Figure 2*** *Distribution of body-massindex (BMI)*


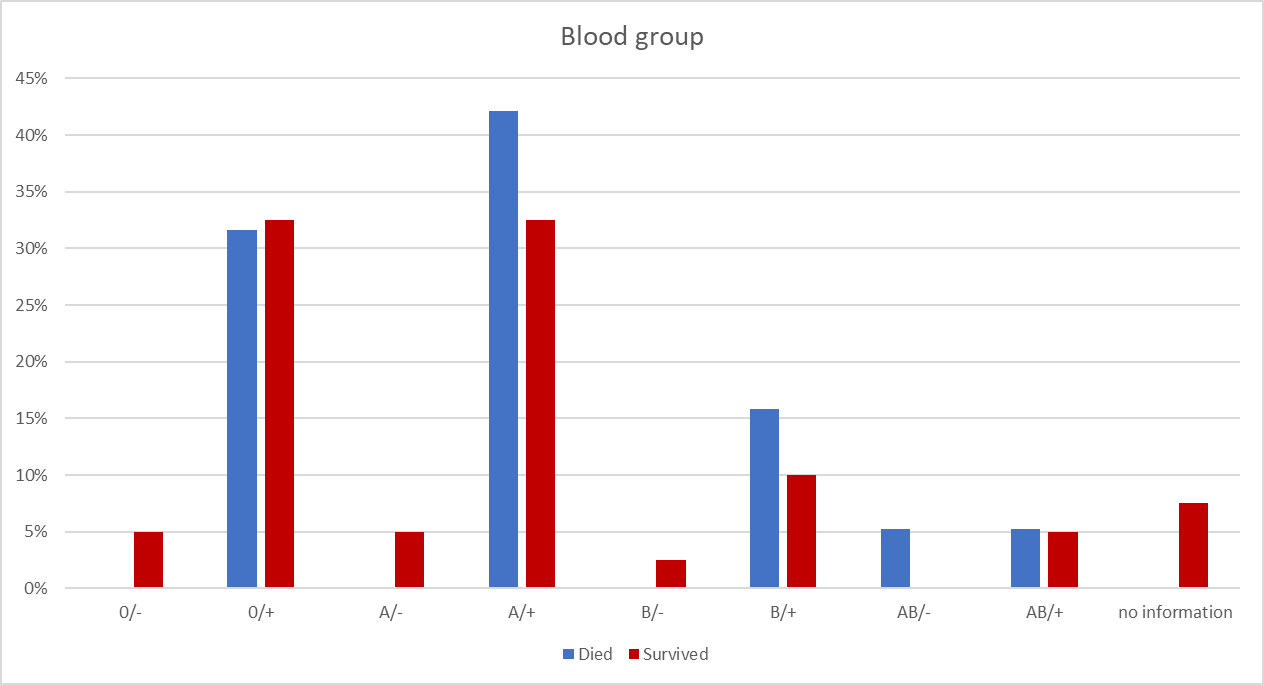


***Figure 3*** *Distribution of the blood groups*


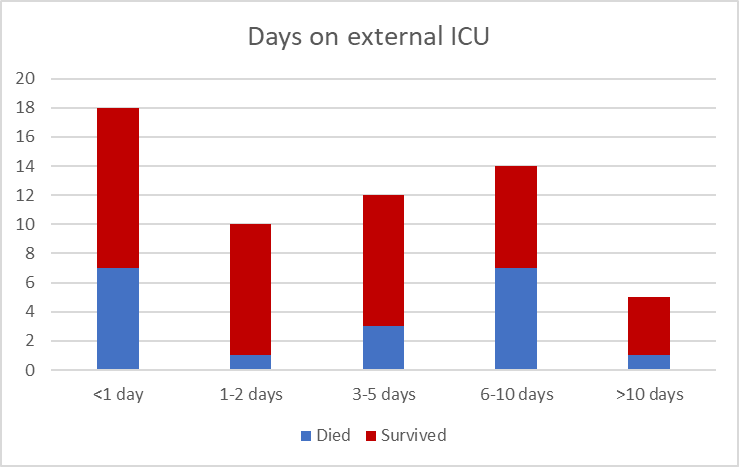


***Figure 4*** *Number of days treated at an external intensive care unit (ICU) before transfer to an ICU at the University Medical Center Regensburg*
